# Supplementary material for: In Vitro Characterization of Probiotic Potential of Limosilactobacillus fermentum against Salmonella Gallinarum Causing Fowl Typhoid
Source: MDPI journal article supplement (doi:10.3390/ani13081284), 2023-04-08
Supplement: s1 [file s1]

**Table.S1 MICs of different antibiotics against *Lactobacillus* isolates**

| Isolates | Organism                             | MICs (µg/mL) of different antibiotics against lactobacilli isolates |     |      |      |     |       |     |     |     |     |     |       |
|----------|--------------------------------------|---------------------------------------------------------------------|-----|------|------|-----|-------|-----|-----|-----|-----|-----|-------|
|          |                                      | P                                                                   | AML | VA   | S    | CN  | ERY   | CIP | CHL | OT  | DA  | BAC | FUS   |
| PC-01    | <i>Limosilactobacillus reuteri</i>   | 32                                                                  | 1   | 64   | 128  | 16  | 16    | 32  | 1   | 32  | 32  | 16  | 8     |
| PC-04    | <i>Ligilactobacillus salivarius</i>  | 1                                                                   | 1   | 64   | 256  | 16  | 0.25  | 64  | 8   | 16  | 32  | 32  | 1     |
| PC-07    | <i>Ligilactobacillus salivarius</i>  | 32                                                                  | 2   | 128  | 128  | 32  | 0.125 | 32  | 16  | 16  | 16  | 16  | 0.5   |
| PC-10    | <i>Limosilactobacillus fermentum</i> | 4                                                                   | 0.5 | 128  | 64   | 2   | 0.125 | 32  | 2   | 2   | 1   | 1   | 0.5   |
| PC-11    | <i>Limosilactobacillus reuteri</i>   | 2                                                                   | 1   | 64   | 256  | 32  | 0.25  | 16  | 16  | 32  | 64  | 32  | 0.125 |
| PC-12    | <i>Limosilactobacillus reuteri</i>   | 2                                                                   | 1   | 128  | >256 | 32  | 16    | 16  | 2   | 64  | 128 | 64  | 0.125 |
| PC-13    | <i>Limosilactobacillus reuteri</i>   | 16                                                                  | 1   | 128  | 128  | 64  | 0.25  | 32  | 1   | 128 | 128 | 64  | 1     |
| PC-15    | <i>Limosilactobacillus reuteri</i>   | 1                                                                   | 2   | >256 | 64   | 32  | 32    | 32  | 1   | 64  | 64  | 32  | 1     |
| PC-17    | <i>Limosilactobacillus reuteri</i>   | 2                                                                   | 2   | 128  | 128  | 16  | 128   | 16  | 2   | 128 | 128 | 16  | 0.5   |
| PC-24    | <i>Limosilactobacillus reuteri</i>   | 1                                                                   | 4   | 128  | 256  | 16  | 0.5   | 64  | 16  | 64  | 32  | 16  | 0.5   |
| PC-25    | <i>Limosilactobacillus reuteri</i>   | 4                                                                   | 4   | 256  | 128  | 32  | 0.125 | 64  | 8   | 32  | 64  | 32  | 1     |
| PC-28    | <i>Limosilactobacillus reuteri</i>   | 16                                                                  | 2   | 128  | 256  | 32  | 0.25  | 32  | 1   | 64  | 32  | 16  | 1     |
| PI-47    | <i>Lactobacillus crispatus</i>       | 32                                                                  | 2   | 64   | 64   | 64  | 0.125 | 64  | 1   | 16  | 16  | 16  | 0.5   |
| PC-55    | <i>Lactobacillus crispatus</i>       | 16                                                                  | 1   | 128  | 64   | 128 | 0.25  | 32  | 2   | 32  | 32  | 1   | 0.5   |
| PC-60    | <i>Lactobacillus crispatus</i>       | 2                                                                   | 16  | 128  | 128  | 64  | 16    | 32  | 2   | 2   | 16  | 1   | 16    |
| PC-65    | <i>Lactobacillus crispatus</i>       | 2                                                                   | 2   | 128  | 128  | 64  | 0.50  | 16  | 2   | 32  | 8   | 16  | 8     |
| PC-68    | <i>Lactobacillus crispatus</i>       | 0.5                                                                 | 1   | >256 | 64   | 32  | 32    | 32  | 1   | 64  | 16  | 16  | 0.5   |
| PC-76    | <i>Limosilactobacillus fermentum</i> | 1                                                                   | 2   | 128  | 256  | 2   | 0.125 | 2   | 1   | 4   | 4   | 2   | 1     |
| PI-80    | <i>Lactobacillus johnsonii</i>       | 1                                                                   | 0.5 | 64   | 64   | 16  | 0.25  | 128 | 1   | 32  | 64  | 64  | 8     |
| PI-83    | <i>Lactobacillus johnsonii</i>       | 2                                                                   | 2   | 128  | 128  | 32  | 0.25  | 32  | 1   | 64  | 64  | 128 | 4     |
| PI-93    | <i>Lactobacillus johnsonii</i>       | 32                                                                  | 1   | 64   | 64   | 32  | 0.50  | 32  | 2   | 32  | 32  | 32  | 16    |

Breakpoints of antibiotics against *Lactobacillus* adopted are as following; **P**: Penicillin $\geq$ 8, **AML**: Amoxycillin $\geq$ 8, **VA**: Vancomycin $\geq$ 2 or n.r, **S**: Streptomycin $\geq$ 16 or 64, **CN**: Gentamicin $\geq$ 8, **ERY**: Erythromycin $\geq$ 1, **CIP**: Ciprofloxacin $\geq$ 4, **CHL**: Chloramphenicol $\geq$ 4, **OT**: Oxytetracycline $\geq$ 4 or 8 or 16, **DA**: Doxycycline $\geq$ 4 or 8 or 16, **BAC**: Bacitracin $\geq$ 8, **FUS**: Fusidic acid $\geq$ 2
